# Supplementary material for: A self-assembled fiber Mach–Zehnder interferometer based on liquid crystals
Source: Royal Society of Chemistry journal article supplement (doi:10.1039/d0tc02482a), 2020-01-01
Supplement: d0tc02482a1.pdf [file d0tc02482a1.pdf]

## Self-assembled fiber Mach-Zehnder interferometer based on liquid crystals

Yong Li<sup>a,b,c</sup>, Yuzhi Chen<sup>a,b,c</sup>, Duo Yi<sup>a,b,c</sup>, Yu Du<sup>a,b,c</sup>, Wei Luo<sup>d</sup>, Xueming Hong<sup>a,b,c</sup>, Xuejin Li<sup>a,b,c,d\*</sup>, Youfu Geng<sup>a,b,c,\*\*</sup>, Dan Luo<sup>e</sup>

<sup>a</sup>College of Physics and Optoelectronic Engineering, Shenzhen University, Shenzhen, 518060, China. Email: lixuejin@szu.edu.cn, gengyf@szu.edu.cn

<sup>b</sup>Shenzhen Key Laboratory of Sensor Technology, Shenzhen, 518060, China.

<sup>c</sup>Shenzhen Engineering Laboratory for Optical Fiber Sensors and Networks, Shenzhen, 518060, China.

<sup>d</sup>The Chinese University of Hong Kong, Shenzhen, 518172, China.

<sup>e</sup>Department of Electrical & Electronic Engineering, Southern University of Science and Technology, Xueyuan Road 1088, Nanshan District, Shenzhen, Guangdong, 518055, China.

### Figure S1: Fabrication process of the LC-based fiber MZI.

As shown in Figure S1 (a), the LC-based fiber MZI is fabricated by six steps method. Firstly, the microtubule is spliced with a SMF<sub>1</sub> by fusion splicer (Fujikura FSM-100P+, Japan) without offset after the automatic alignment (Step i). The inner and outer diameters of the microtubule are 50  $\mu\text{m}$  and 125  $\mu\text{m}$ , respectively, and the cross-section as shows in the Figure 5(b). The microtubule is then cut to leave a 300  $\mu\text{m}$  length between the splicing point and the microtubule ending (Step ii). In our experiment, we also selected 200  $\mu\text{m}$  and 400  $\mu\text{m}$  length of microtubes, but no obvious interference spectra were observed from the device. For the 200  $\mu\text{m}$  microtubule, the untwisted LC area is too short as the length of the twisted LC area is about 140  $\mu\text{m}$ , resulting in the free spectrum range (FSR,  $\lambda^2/(\Delta n L)$ ) of the LC-based fiber MZI beyond the range of the spectrometer. For 400  $\mu\text{m}$  microtubule, the light is scattered within liquid crystal and disrupted the formation of the interference spectrum as the length is too long. In the step iii, the microtubule is spliced with a SMF<sub>2</sub> by fusion splicer with a 5  $\mu\text{m}$  position offset along Y direction relative to SMF<sub>2</sub> after the automatic alignment. In the experiment, the position offset of 5  $\mu\text{m}$  conducive to forming interference fringe for the MZI. The spliced sandwich structure of SMF<sub>1</sub>-microtubule-SMF<sub>2</sub> is shown in Figure 5(c). The side of the microtubule is etched by a femtosecond laser (central wavelength is 795 nm, Spectrum Physics Co. Ltd) with a groove having a 300  $\mu\text{m}$  length, 50  $\mu\text{m}$  width and 87  $\mu\text{m}$  depth, respectively, thus forming an exposed-core groove (ECG) by the microtubule and fiber-end (Step iv). The side and cross-section of the ECG structure after laser processing are shown in Figure 5(d) and Figure 5(e), respectively. Then, the inside wall of the ECG coated with vertical PI after cleaned by ethanol and deionized water (Step v). Finally, the ECG is filled with LC, and the LC-based fiber MZI is fixed on the glass slide with glue to protect ECG structure (Step vi).

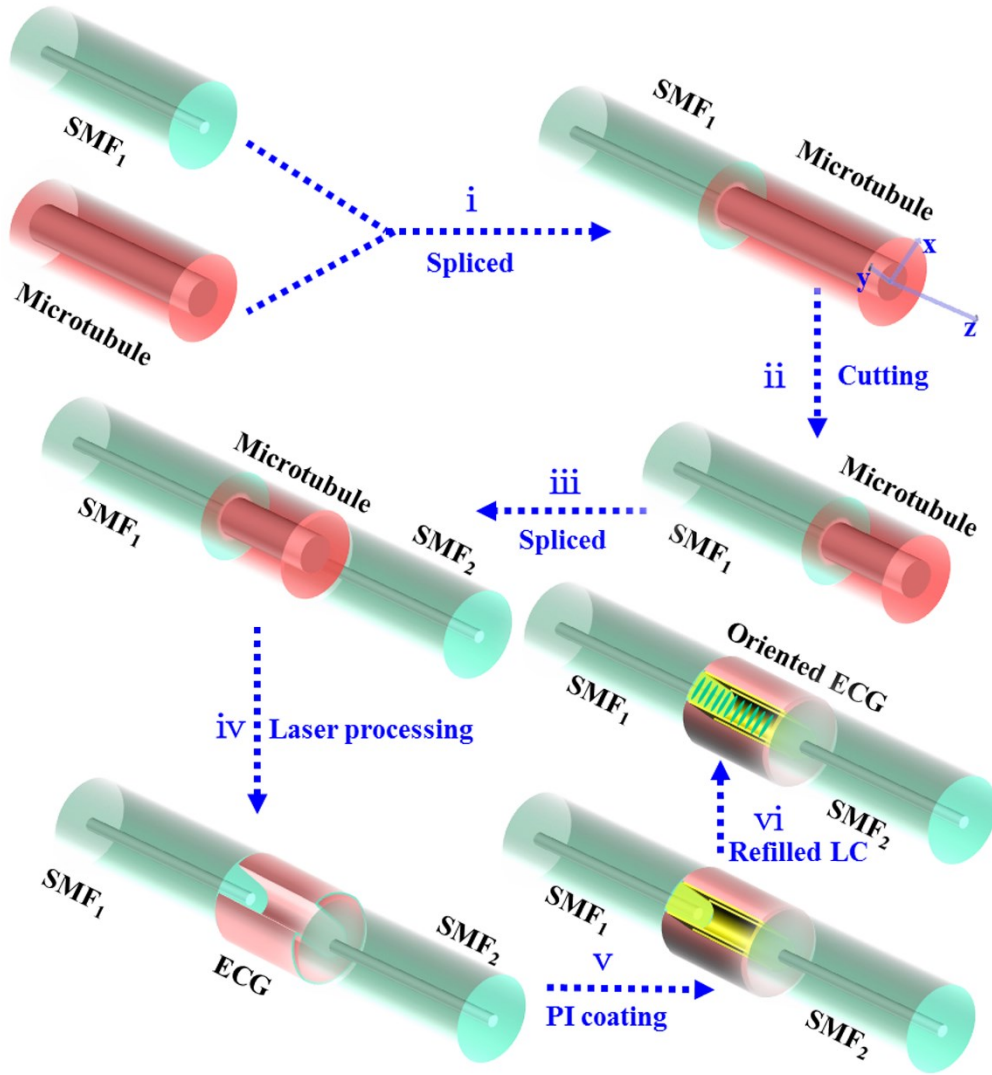

Fig. S1. (a) The fabrication process of the MZI. (i). The microtubule is spliced with a SMF<sub>1</sub> by fusion splicer. (ii). The microtubule is cleaved by fiber cutter to a certain length. (iii). The SMF<sub>1</sub>-microtubule is spliced with SMF<sub>2</sub> by fusion splicer. (iv). The structure of the ECG is prepared by femtosecond laser. (v). A PI film is coated on the inside wall of the ECG. (vi). The structure of the ECG is filled with LC.

**Figure S2:** The liquid crystal transition after adsorbing VOC vapor.

Figure S2 (a) depicts the detection process of the liquid crystal (LC) transition as increasing the concentration of ethanol vapor. The LC-1001 is filled into the LC cell with vertical orientation. The cell thickness is 50  $\mu\text{m}$ . Then, the ethanol cotton is close to the LC cell, and release vapor into LC. Finally, the cotton is removed from the LC cell. Figure S2 (b-d) show the device images observed under a polarizing optical microscope, where the directions of polarizer and analyzer are represented by P and A, respectively. It can be seen from the Figure S2 (b) that the device is in a dark state. The LC molecules are oriented perpendicular to the substrate. In the Figure S2 (c), we can clearly see that the device shows dark to bright transition when the ethanol cotton is close to the LC cell. The dark and bright transition indicates that the alignment of the LC molecules is reoriented in the LC cell. In addition to becoming brighter, the

**a** LC cell with vertical oriented

Ethanol cotton

Remove the cotton swab

— Liquid crystal in anisotropic phase • Liquid crystal in isotropic phase • Ethanol molecules

**b**

500  $\mu\text{m}$

**c**

Ethanol cotton

**d**

[illegible]

Fig. S3. Michel-levy color chart. (from Carl Zeiss Microscopy GmbH)

**Figure S4:** The transmission spectra of the MZI with LC-1001 measured with different temperature.

Figure S4 plots the transmission spectra of the fiber MZI blue-shifts with increasing temperature. The attenuation peak gets blue-shifts 1.335 nm to 1682.947 nm from attenuation peak wavelength of 1684.282 nm as the temperature increases from 25 °C to 40 °C. A small blue-shift phenomenon indicates that the interference spectrum of the LC-based MZI with LC-1001 can be achieved low crosstalk from temperature when the temperature changes between 25 °C and 40 °C, this result is consistent with the measurement of the LC-1001 refractive index. The attenuation peak wavelength blue-shifts from 1682.947 nm to 1666.7 nm, due to the large changes of the refractive index difference ( $n_e - n_o$ ) of liquid crystal as the temperature increases from 40 °C to 55 °C. Therefore, the LC-based fiber MZI can realize low crosstalk from temperature when detection of VOC vapor at temperature range from 25 °C to 40 °C.

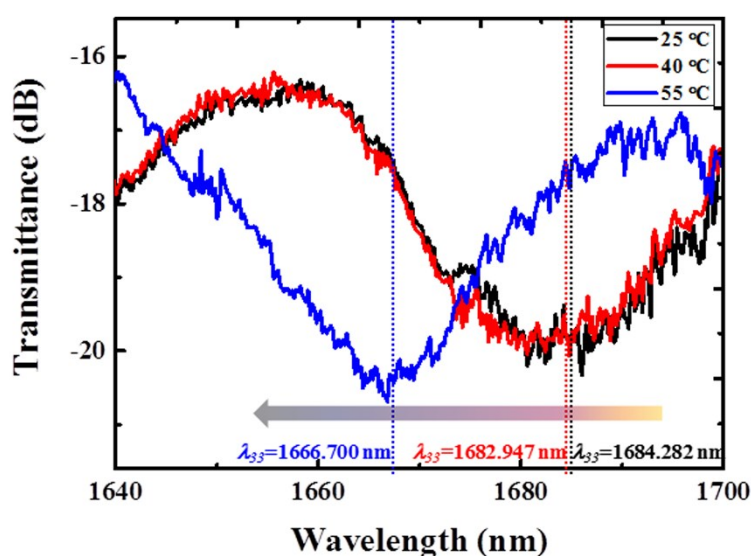

Fig. S4. The transmission spectra of the MZI with LC-1001 measured with temperature increases from 25 °C to 55 °C.
